# Supplementary material
Source: Royal Society of Chemistry journal article supplement (doi:10.1039/d6ay00151c)
Supplement: d6ay00151c1.pdf [file d6ay00151c1.pdf]

1 **Supplementary Documents**

2 **Capillary-SERS Sensor Based on Aptamer-Mediated Inhibition**  
3 **of Nanozyme Catalysis for Ultrasensitive Detection of**  
4 **Homocysteine in Serum from Hepatocellular Carcinoma**  
5 **Patients**

6 Wangxuan Xia <sup>1</sup>, Juncheng Shi <sup>2</sup>, Yongjin Yu <sup>2</sup>, Ming Tan <sup>2</sup>, Lin Xia <sup>2</sup>, Chun Dai <sup>2,\*</sup>

7 <sup>1</sup>The Second School of Clinical Medicine, Nanjing Medical University, Nanjing, Jiangsu,  
8 211166 China.

9 <sup>2</sup>Department of General Surgery, The People's Hospital of Yangzhong City, Yangzhong,  
10 Jiangsu,212200 China.

11

12 \*Correspondence: dt7931@sina.com

13

## 14 **Clinical Sample Characterization**

15 HCC can be definitively diagnosed through imaging and pathological examinations. As  
16 shown in Fig. S1(a-b), hematoxylin-eosin (H&E) staining reveals that the tumor cells  
17 exhibit typical trabecular and pseudoglandular architectural patterns, with a markedly  
18 increased cellular density. The nuclei are irregular in shape with prominent nucleoli,  
19 findings that are consistent with the histopathological characteristics of HCC. Contrast-  
20 enhanced CT images acquired during the arterial, portal venous, and delayed phases (Fig.  
21 S1(c-e)) demonstrate a focal solid mass located at the top of a cystic hypodense lesion. This  
22 mass shows strong enhancement in the arterial phase, followed by rapid washout in the  
23 portal venous and delayed phases, representing the characteristic “wash-in and wash-out”  
24 hemodynamic enhancement pattern of HCC. Further multiplanar contrast-enhanced CT  
25 images (Fig. S1(f-h)) confirm that the solid tumor is situated above the cystic lesion, and its  
26 morphological features, enhancement behavior, and well-defined boundary with the  
27 surrounding normal liver parenchyma are all highly consistent with the imaging diagnostic  
28 criteria for HCC. Although contrast-enhanced CT plays an important role in the diagnosis of  
29 liver cancer, it is limited by radiation exposure and relatively high cost, while tissue biopsy  
30 is invasive and therefore unsuitable for large-scale population screening. Consequently, the  
31 capillary-SERS sensor developed in this study is expected to provide a convenient, rapid,  
32 and minimally invasive strategy for early screening of HCC, thereby better meeting the  
33 urgent clinical need for efficient screening tools.

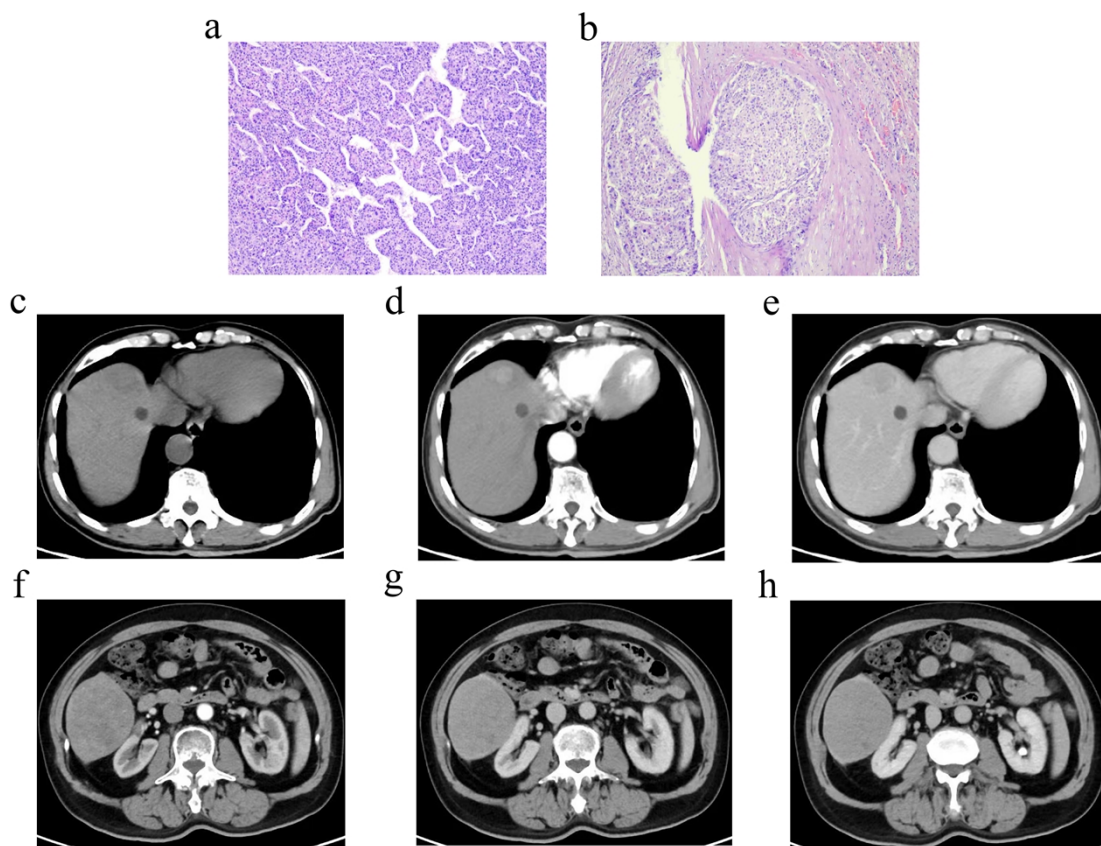

34

35 **Figure S1.** (a-b) HE-stained histological section of cancer tissue; (c-e) Enhanced CT image of the upper  
 36 abdomen; (f-h) Enhancing CT Images at Different Levels.

37

38

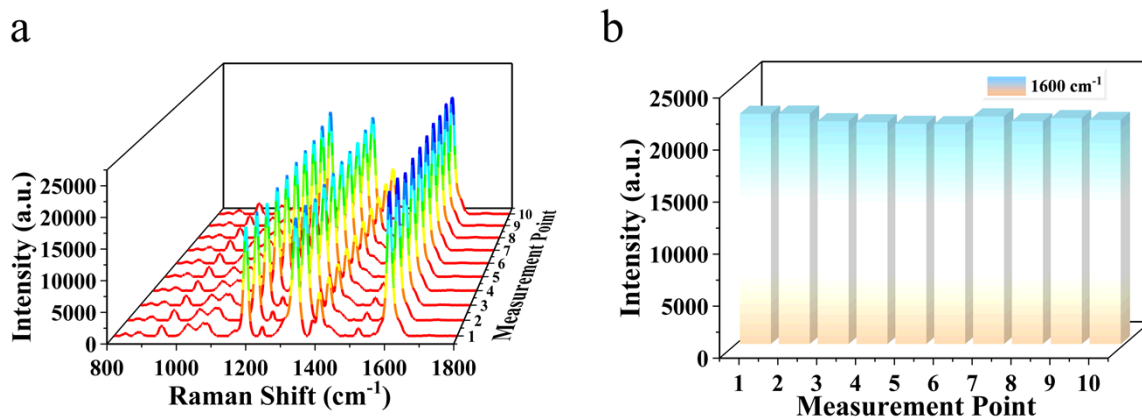

39

40 **Figure S2.** (a) SERS images of 10 arbitrary points on the sensor; (b) The histogram of 10 points of the  
 41 sensor at 1600 cm<sup>-1</sup>.

42

43

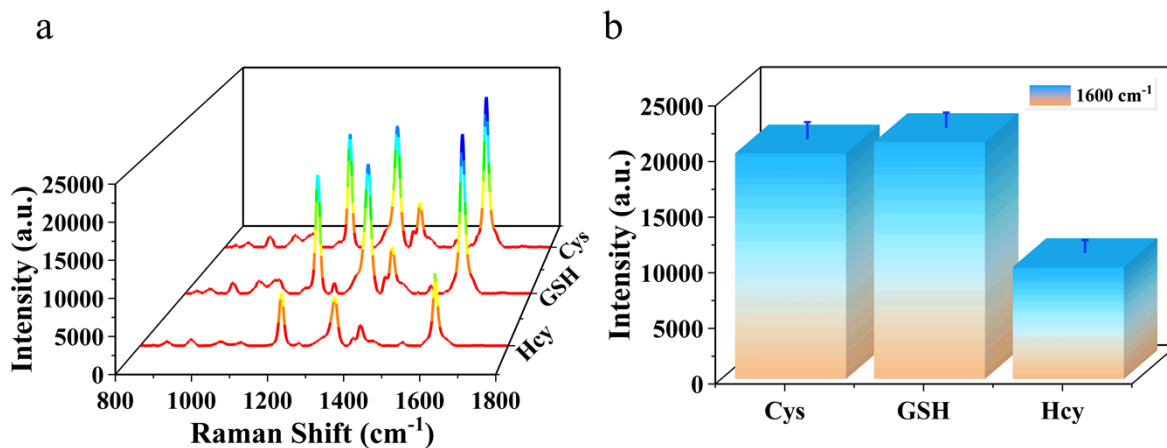

44  
 45 **Figure S3.** (a) SERS spectra in the presence of potential interferences (GSH, Cys, Hcy); (b) SERS  
 46 intensity histogram of different interferences at 1600 cm<sup>-1</sup>.

47  
 48

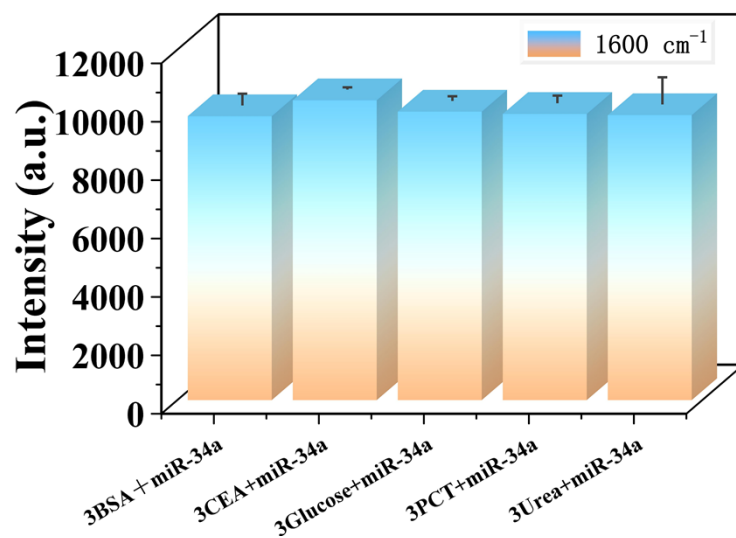

49  
 50 **Figure S4.** Interferents were tested at concentrations 3 times higher than Hcy

51  
 52
